# Supplementary material for: Establishment and Characterization of New Canine and Feline Osteosarcoma Primary Cell Lines
Source: PubMed Central journal article supplement (PMC5644629; doi:10.3390/vetsci3020009), 2016-06-01
Supplement: vetsci-03-00009-s001.pdf [file vetsci-03-00009-s001.pdf]

Table S1. Cont.

|      |                                | <i>ALPL</i> |    | <i>SPP1</i> |    | <i>SPARC</i> |    | <i>BGLAP</i> |    |
|------|--------------------------------|-------------|----|-------------|----|--------------|----|--------------|----|
|      |                                | Amplicon    | MC | Amplicon    | MC | Amplicon     | MC | Amplicon     | MC |
| 1189 | CC                             | +           | +  | +           | +  | +            | +  | -            | -  |
| 1220 | Tumour                         | -           | -  | +           | +  | +            | +  | -            | -  |
| 1220 | CC                             | +           | +  | +           | +  | +            | +  | -            | -  |
| MC   | melting curve                  |             |    |             |    |              |    |              |    |
| +    | positive result                |             |    |             |    |              |    |              |    |
| ~    | very late amplification signal |             |    |             |    |              |    |              |    |
| -    | negative result                |             |    |             |    |              |    |              |    |

+ Positive result; ~ very late amplification signal; - negative result.

## 2. DNA Fingerprint Assay

Microsatellite analysis of the established primary cell lines confirmed their origin from the corresponding tumor. In feline samples 16 markers were tested. All markers were identical between tumor tissue and cells in culture. In dogs, 18 markers were tested. COS\_1033 and COS\_1186h cells and tumor were completely identical in their marker setup, although one marker failed to amplify in the latter, both in tumor and in the cell line. COS\_1220 showed one allele changed in a single marker, COS\_1189 had alterations in two alleles. Three markers differed between COS\_1186w and the tumor, although one marker failed to amplify in the tumor sample, but not in the cell line. A complete list of the obtained microsatellite data as first published in [1] is supplied in Table S2 and S3. These list can be helpful in future experiments to exclude cross contaminations.

Table S2. Length of microsatellites in dogs used to confirm the cell cultures origins.

| Microsatellite <sup>a</sup> | 1033    | COS_1033     | 1186    | COS_1186h    | COS_1186w    | 1189    | COS_1189     | 1220    | COS_1220     |
|-----------------------------|---------|--------------|---------|--------------|--------------|---------|--------------|---------|--------------|
|                             | Tumour  | Cell Culture | Tumour  | Cell Culture | Cell Culture | Tumour  | Cell Culture | Tumour  | Cell Culture |
| AHT121:                     | 102/102 | 102/102      | -/-     | -/-          | 98/102       | 106/112 | 106/116      | 102/102 | 102/102      |
| AHT137:                     | 131/135 | 131/135      | 135/137 | 135/137      | 135/137      | 131/139 | 131/139      | 131/131 | 131/131      |
| AHTH171:                    | 233/233 | 233/233      | 221/229 | 221/229      | 221/229      | 229/229 | 229/229      | 219/219 | 219/219      |
| AHTH260:                    | 238/244 | 238/244      | 238/244 | 238/244      | 238/244      | 246/250 | 246/250      | 244/244 | 244/244      |
| AHTK211:                    | 87/95   | 87/95        | 91/91   | 91/91        | 91/91        | 91/99   | 91/99        | 95/95   | 95/95        |
| AHTK253:                    | 288/292 | 288/292      | 288/292 | 288/292      | 288/292      | 290/292 | 286/290      | 288/288 | 288/288      |

Table S2. Cont.

| <b>Microsatelite <sup>a</sup></b> | <b>1033 Tumour</b> | <b>COS_1033 Cell Culture</b> | <b>1186 Tumour</b> | <b>COS_1186h Cell Culture</b> | <b>COS_1186w Cell Culture</b> | <b>1189 Tumour</b> | <b>COS_1189 Cell Culture</b> | <b>1220 Tumour</b> | <b>COS_1220 Cell Culture</b> |
|-----------------------------------|--------------------|------------------------------|--------------------|-------------------------------|-------------------------------|--------------------|------------------------------|--------------------|------------------------------|
| CXX279:                           | 120/124            | 120/124                      | 124/124            | 124/124                       | 124/126                       | 118/126            | 118/126                      | 120/124            | 120/124                      |
| FH2054:                           | 152/156            | 152/156                      | 152/156            | 152/156                       | 152/156                       | 152/156            | 152/156                      | 168/172            | 168/172                      |
| FH2848:                           | 236/242            | 236/242                      | 242/246            | 242/246                       | 242/246                       | 232/238            | 232/238                      | 230/236            | 230/236                      |
| INRA21:                           | 99/105             | 99/105                       | 105/105            | 105/105                       | 99/105                        | 95/95              | 95/95                        | 101/101            | 101/101                      |
| INU005:                           | 124/124            | 124/124                      | 122/126            | 122/126                       | 122/126                       | 110/124            | 110/124                      | 124/132            | 124/132                      |
| INU030:                           | 144/156            | 144/156                      | 144/150            | 144/150                       | 144/150                       | 150/150            | 150/150                      | 144/144            | 144/144                      |
| INU055:                           | 210/222            | 210/222                      | 210/218            | 210/218                       | 210/218                       | 210/210            | 210/210                      | 210/222            | 210/222                      |
| REN162C04:                        | 200/200            | 200/200                      | 206/206            | 206/206                       | 206/206                       | 202/206            | 202/206                      | 202/202            | 202/202                      |
| REN169D01:                        | 216/216            | 216/216                      | 212/216            | 212/216                       | 212/216                       | 210/212            | 210/212                      | 214/216            | 216/216                      |
| REN169O18:                        | 164/168            | 164/168                      | 162/164            | 162/164                       | 162/164                       | 162/172            | 162/172                      | 164/170            | 164/170                      |
| REN247M23:                        | 272/272            | 272/272                      | 268/268            | 268/268                       | 268/268                       | 268/272            | 268/272                      | 268/272            | 268/272                      |
| REN54P11:                         | 226/226            | 226/226                      | 226/232            | 226/232                       | 226/232                       | 224/226            | 224/226                      | 226/236            | 226/236                      |

<sup>a</sup> Microsatelite names are based on the standards of the ISAG Comparison Test 2006.

Table S3. Length of microsatelites in cats used to confirm the cell cultures origins.

| <b>Microsatelite <sup>a</sup></b> | <b>1140 Tumour</b> | <b>FOS_1140 Cell Culture</b> | <b>1077 Tumour</b> | <b>FOS_1077 Cell Culture</b> |
|-----------------------------------|--------------------|------------------------------|--------------------|------------------------------|
| FCA 069                           | 103/107            | 103/107                      | 105/109            | 105/109                      |
| FCA 075                           | 132/134            | 132/134                      | 126/134            | 126/134                      |
| FCA 105                           | 197/205            | 197/205                      | 201/203            | 201/203                      |
| FCA 149                           | 124/124            | 124/124                      | 124/130            | 124/130                      |
| FCA 220                           | 214/214            | 214/214                      | 212/214            | 212/214                      |
| FCA 229                           | 168/168            | 168/168                      | 168/168            | 168/168                      |
| FCA 310                           | 138/138            | 138/138                      | 128/130            | 128/130                      |
| FCA 441                           | 155/155            | 155/155                      | 155/159            | 155/159                      |
| FCA 678                           | 190/192            | 190/192                      | 190/192            | 190/192                      |
| FCA 005                           | 148/148            | 148/148                      | 144/148            | 144/148                      |

Table S3. Cont.

| Microsatellite <sup>a</sup> | 1140 Tumour | FOS_1140 Cell Culture | 1077 Tumour | FOS_1077 Cell Culture |
|-----------------------------|-------------|-----------------------|-------------|-----------------------|
| FCA 026                     | 146/146     | 146/146               | 156/158     | 156/158               |
| FCA 201                     | 145/155     | 145/155               | 143/161     | 143/161               |
| FCA 224                     | 160/160     | 160/160               | 160/160     | 160/160               |
| FCA 293                     | 187/187     | 187/187               | 187/187     | 187/187               |
| FCA 453                     | 188/200     | 188/200               | 188/196     | 188/196               |
| FCA 649                     | 138/138     | 138/138               | 126/140     | 126/140               |

<sup>a</sup> Microsatellite names are based on the standards of the ISAG Comparison Test 2006.

## References

1. Meyer, F.R.L.; Steinborn, R.; Grausgruber, H.; Wolfesberger, B.; Walter, I. Expression of platelet-derived growth factor BB, erythropoietin and erythropoietin receptor in canine and feline osteosarcoma. *Vet. J.* **2015**, *206*, 67–74.

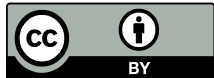

© 2016 by the authors; licensee MDPI, Basel, Switzerland. This article is an open access article distributed under the terms and conditions of the Creative Commons by Attribution (CC-BY) license (<http://creativecommons.org/licenses/by/4.0/>).
